# Supplementary material for: Bridging the Gap: Doulas’ Views on Access for Minority Women
Source: Research Square preprint supplement (doi:10.21203/rs.3.rs-7801563/v1), 2025-11-28
Supplement: Supplementary file 1 [file 58deb22137d1daa27c814b78.docx]

**Mother Focus Group Questions**

1. Tell me about your pregnancy and birthing experience. How did you imagine your pregnancy and or postpartum experience going?

a. Did you feel as if you had enough support during pregnancy and postpartum? Who could you call on? (Family, friends, medical providers, etc)?

b. Was there a time you looked for support that wasn’t available?

c. Was there a time you looked for support that was available? How did you access it?

2. What are your views on doulas?

a.What do you know or have heard about doulas?

b. What would promote you using a doula?

c. What might prevent or keep you from using a doula?

i.Where is your hesitation?

3. Have you ever used Doula Services before? Do you know of any doula services around you in your community?

a. How did you access doula care?

b. How was the process of accessing?

c.Were there any factors that support you in accessing doula care?

d. What are the factors that hindered your access? If so, what?

e. Are there ways that you believe the process can be improved? If so, what?

f. How did your process go with the payment of their services? How much did you pay for services?

g. Did you use health insurance to pay for your doula care?

i.Were there any barriers to accessing doula care through an insurance provider?

5. How was your experience with Doula Care?

a. Did you get the support you needed?

b. Were they able to assist you during any pregnancy or birthing complications?

c. How did you feel about their presence during this time?

d. Would you recommend other women use Doula care?

6. Is there anything that you feel is important that we missed when talking about doula care?

**Doula Focus Group Questions**

1.What made you want to become a doula?

- 1. How would you describe your experience with the doula certification process?
  2. How are you getting your clients to meet your certification requirements?

2. What are your thoughts on the currently available access to doula care for clients?

a.What are you doing as a doula to promote the services of doulas

b.When are clients engaging with you? 1st pregnancy or 8/9th pregnancy

c.What have you seen in the difference in 1st time moms vs multiple pregnancy parents

3. What do you believe are clients' perceptions of doulas?

a.How did you clarify misconceptions about doula care?

b. Do you believe this supports or hinders access or use?

c. Do you see any change in perception based on race and/or socio-economic status?

4. Other than the client's views/ perception, what do you think promotes clients to use doulas (specific to black and hispanic women in our region)?

5. Other than the client's views/ perception,what do you think hinders clients from using doula care (specific to black and hispanic women in our region)?

6. What are your thoughts on the current insurance reimbursements for doula care?

a. Is it adequate?

b. Do you think enough visits are covered?

c. What are your thoughts on the reimbursement amounts?

d. Are there any changes to access and reimbursement you would recommend that would help you be able to provide care

e. What barriers have you encountered with dealing with the medicaid system?

f. What are your thoughts on state by state comparison for reimbursement related to care rate?

7.Can you share your experience getting certified under Maryland Medicaid?

a. Can you share any challenges you have faced when getting certified to care for Medicaid clients?

8. What obstacles/benefits have you encountered when working with Medicaid clients in urban cities like Baltimore City?

a.What strategies have you put in place to combat those obstacles?

b.What words of advice would you give to other doulas they can use to navigate the obstacles

9. What factors influence where you serve as a doula

a. In what ways do you think the certification process, reimbursement, or client availability impacts doulas reaching out to women of color in urban areas?

10. Do you have a doula mentor?

a.How did you find your mentor?

b.How has having a mentor (or not) impacted your experience as a new doula?

c.What characteristics do you look for in a mentor?

- - 1. Business model
    2. Holistic practice
    3. Advocacy

11. Is there anything that you feel is important that we missed when talking about doula care, access, or reimbursement?
